# Supplementary material
Source: ML conference proceedings conference paper supplement (https://openaccess.thecvf.com/content/CVPR2021/html/Sain_StyleMeUp_Towards_Style-Agnostic_CVPR_2021_paper.html)
Supplement: Supplementary file 1 [file Sain_StyleMeUp_Towards_Style-Agnostic_CVPR_2021_supplemental.pdf]

# Supplementary material for StyleMeUp: Towards Style-Agnostic Sketch-Based Image Retrieval

Aneeshan Sain<sup>1,2</sup> Ayan Kumar Bhunia<sup>1</sup> Yongxin Yang<sup>1,2</sup>  
Tao Xiang<sup>1,2</sup> Yi-Zhe Song<sup>1,2</sup>

<sup>1</sup> SketchX, CVSSP, University of Surrey, United Kingdom

<sup>2</sup> iFlyTek-Surrey Joint Research Centre on Artificial Intelligence.

## Additional explanations

### Clarity on bridging domain gap:

From the viewpoint of bridging the domain gap, a gradient reversal layer is employed in Dey *et al.* [10], that is used to create a domain-agnostic embedding, which however does not differentiate if it comes from a sketch or a photo. Our motivation is different – in addition to tackling the sketch-photo domain gap, we further focus on narrowing the domain gaps that exist amongst different sketching styles (i.e., learning a style-agnostic embedding). In particular, the *feature transformation layer* helps bridge this style gap by simulating varying distributions in the intermediate layers of the encoder, and thus condition the encoder to *generalise onto unseen sketching styles*. The meta-learning paradigm further ensures that this notion of style variance is minimised over episodic training, finally resulting in a style-agnostic embedding.

### Additional experimental comparison:

The results of DSH and GDH on Sketchy and TU-Berlin have been taken directly from their respective papers. For further transparency we re-run these baselines using Inception-V3 as backbone. Table 4 shows these results to be in line with our conclusions for Sketchy and TUBerlin datasets respectively –

Table 4. Quantitative analysis using Inception-V3 backbone

| Method | Sketchy      |              | TUBerlin     |              |
|--------|--------------|--------------|--------------|--------------|
|        | mAP          | P@200        | mAP          | P@200        |
| DSH    | 0.725        | 0.867        | 0.537        | 0.660        |
| GDH    | 0.821        | 0.896        | 0.696        | 0.741        |
| Ours   | <b>0.905</b> | <b>0.927</b> | <b>0.778</b> | <b>0.795</b> |

### More on training details:

The hyperparameters  $\lambda_{1 \rightarrow 3}$  have been determined empirically. The impact of  $\mathcal{L}_{KL}$  is suppressed ( $\lambda_1=0.001$ ) during initial stages of training, and increased with linear scheduling later for better training stability. We further observed that  $\lambda_2$  works best if kept constant throughout. Changing  $\lambda_3$  had generally produced comparatively lower results. Margin hyperparameters for triplet losses  $\mu^{z_{inv}}$  and  $\mu^{z_f}$  were set empirically as well. Please note that unlike few-shot adaption in MAML, there is no adaptation step here during inference. Instead, meta-learning is employed only during training to learn a style-agnostic feature encoder for better generalisation.

### More on Fusing modal invariant and modal specific features:

Combining these two components helps the model in keeping important details that might have been removed during disentanglement, for image (sketch/photo) reconstruction. Furthermore, as we intend to learn *how to disentangle* modal-invariant feature from modal-specific one, combining them to obtain a proper reconstruction re-verifies that the disentanglement itself has been learned properly. However, experimental results suggested that element-wise addition performs better than concatenating the two components together. This is probably because the former establishes a clearer boundary between the disentangled components than concatenation.
